# Supplementary material for: Studying the impact of shear onto the mixing processes of a turbulent stratified flame by means of Large Eddy Simulation.
Source: Atypon-hosted journal article supplement (doi:10.1176/appi.ajp.2013.13010126), 2013-01-01

## Supplementary Methods: Imaging Parameters

Each site followed the Alzheimer's Disease Neuroimaging Initiative (ADNI) protocol appropriate for each scanner brand and model. The MPRAGE acquisition parameters were comparable across sites:

Site 1: 3D acquisitions, sagittal slab, shot interval 2300ms, inversion time 700ms, TR 6.988ms, TE 2.848ms, flip angle 8°, FOV 260 (foot-to-head) x 260 (anterior-to-posterior) mm<sup>2</sup>, matrix 256x256, in-plane resolution 1.016x1.016 mm<sup>2</sup>, 166 slices (left-to-right), slice thickness 1.2 mm, voxel size 1.016x1.016x1.2mm<sup>3</sup>, total scan duration 10 min 28 sec.

Site 2: 3D acquisitions, sagittal slab, shot interval 3000ms, inversion time 846ms, TR 6.8ms, TE 3.1ms, flip angle 8°, FOV 256 (foot-to-head) x 240 (anterior-to-posterior) mm<sup>2</sup>, matrix 256x240, in-plane resolution 1 x 1 mm<sup>2</sup>, 170 slices (left-to-right), slice thickness 1.2 mm, voxel size 1x1x1.2mm<sup>3</sup>, total scan duration 9 min 19 sec.

Site 3: 3D acquisitions, sagittal slab, shot interval 2300ms, inversion time 900ms, TR 7.2ms, TE 2.91ms, flip angle 9°, FOV 256 (foot-to-head) x 240 (anterior-to-posterior) mm<sup>2</sup>, matrix 256x240, in-plane resolution 1x1 mm<sup>2</sup>, 160 slices (left-to-right), slice thickness 1.2 mm, voxel size 1x1x1.2mm<sup>3</sup>, total scan duration 9 min 14 sec.

Site 4: 3D acquisitions, sagittal slab, shot interval 2300ms, inversion time 900ms, TR 6.8ms, TE 2.91ms, flip angle 9°, FOV 256 (foot-to-head) x 240 (anterior-to-posterior) mm<sup>2</sup>, matrix 256x240, in-plane resolution 1x1 mm<sup>2</sup>, 160 slices (left-to-right), slice thickness 1.2 mm, voxel size 1x1x1.2mm<sup>3</sup>, total scan duration 9 min 14 sec.

To ensure between- and within-site data compatibility, standardized ADNI phantoms at each site were imaged weekly, and drift in linear gradient calibration was monitored regularly throughout the study. Measurements of non-linear geometric fidelity and correction for gradient non-linearity occurred once at each site, and again in the event of a hardware upgrade.

**Table S1. The rates of lifetime DSM-IV psychiatric disorders in relatives**

| N (%)                                                      | Relatives of<br>Schizophrenia<br>Probands<br>(n=134) | Relatives of<br>Schizoaffective<br>Probands<br>(n=106) | Relatives of<br>Bipolar<br>Probands<br>(n=129) |
|------------------------------------------------------------|------------------------------------------------------|--------------------------------------------------------|------------------------------------------------|
| <b>Unaffected (no Axis I, II diagnoses)</b>                | <b>54 (40.3)</b>                                     | <b>40 (37.74)</b>                                      | <b>47 (36.43)</b>                              |
| <b>Axis I diagnoses (SCID-I/P)*</b>                        |                                                      |                                                        |                                                |
| • Bipolar disorder                                         | 2 (1.49)                                             | 5 (4.72)                                               | 12 (9.3)                                       |
| • Major depressive disorder                                | 39 (29.1)                                            | 33 (31.13)                                             | 35 (27.13)                                     |
| • Substance use disorder                                   | 32 (23.88)                                           | 19 (17.92)                                             | 31 (24.03)                                     |
| • Anxiety disorder                                         | 22 (16.42)                                           | 23 (21.7)                                              | 29 (22.48)                                     |
| • Other                                                    | 12 (8.96)                                            | 9 (8.49)                                               | 13 (10.08)                                     |
| <b>Axis II diagnoses (SIDP-IV)</b>                         |                                                      |                                                        |                                                |
| <b>• Psychosis Spectrum/Cluster A personality disorder</b> |                                                      |                                                        |                                                |
| Paranoid                                                   | <b>11 (8.21)</b>                                     | <b>16 (15.09)</b>                                      | <b>7 (5.43)</b>                                |
| Schizoid                                                   | 10 (7.46)                                            | 11 (10.38)                                             | 4 (3.1)                                        |
| Schizotypal                                                | 1 (0.75)                                             | 6 (5.66)                                               | 2 (1.55)                                       |
| Schizotypal                                                | 0 (0.0)                                              | 3 (2.83)                                               | 2 (1.55)                                       |
| <b>• Cluster B personality disorder</b>                    |                                                      |                                                        |                                                |
| Borderline                                                 | <b>6 (4.48)</b>                                      | <b>9 (8.49)</b>                                        | <b>7 (5.43)</b>                                |
| Borderline                                                 | 1 (0.75)                                             | 5 (4.72)                                               | 4 (3.1)                                        |
| Antisocial                                                 | 5 (3.73)                                             | 4 (3.77)                                               | 2 (1.55)                                       |
| Narcissistic                                               | 3 (2.24)                                             | 3 (2.83)                                               | 3 (2.33)                                       |
| Histrionic                                                 | 0 (0.0)                                              | 0 (0.0)                                                | 0 (0.0)                                        |
| <b>• Cluster C personality disorder</b>                    |                                                      |                                                        |                                                |
| Dependent                                                  | <b>21 (15.67)</b>                                    | <b>9 (8.49)</b>                                        | <b>15 (11.63)</b>                              |
| Dependent                                                  | 1 (0.75)                                             | 0 (0.0)                                                | 0 (0.0)                                        |
| Avoidant                                                   | 7 (5.22)                                             | 4 (3.77)                                               | 7 (5.43)                                       |
| Obsessive - compulsive                                     | 14 (10.45)                                           | 6 (5.66)                                               | 9 (6.98)                                       |
| <b>Multiple Axis I and /or II diagnoses</b>                | <b>52 (38.81)</b>                                    | <b>42 (39.62)</b>                                      | <b>47 (36.43)</b>                              |

\* Relatives with lifetime DSM-IV Axis I diagnoses of psychotic disorders were not included in this analysis. Therefore, all reported Axis I diagnoses are restricted to non-psychotic disorders. Each Axis I-II diagnosis in relatives is reported separately. The number of relatives who had more than one Axis I/II diagnosis is indicated under 'Multiple Axis I and/or II diagnoses'.

DSM-IV – the Diagnostic and Statistical Manual of Mental Disorders, 4th edition, American Psychiatric Association (1994), SCID-I/P – the Structured Clinical Interview for DSM-IV Axis I Disorders, SIDP-IV – the Structured Interview for DSM-IV Personality Diagnoses

**Table S2. Regions of gray matter volume difference between the psychosis dimension and healthy control groups based on Voxel-Based Morphometry**

| Group comparison                                                       | Brain region                        | Volume (Voxels)               | Maximum <i>t</i> ( Talairach coordinates: x, y, z) * |
|------------------------------------------------------------------------|-------------------------------------|-------------------------------|------------------------------------------------------|
|                                                                        |                                     | Left / Right                  | Left / Right                                         |
| <b>The psychosis dimension groups vs. healthy controls comparisons</b> |                                     |                               |                                                      |
| HC – Probands                                                          | <b><i>Frontal</i></b>               |                               |                                                      |
|                                                                        | Middle frontal gyrus                | 6993 / 8563                   | 8.4 (-30, 50, 2) / 8.1 (25, 55, -8)                  |
|                                                                        | Superior frontal gyrus              | 5926 / 6044                   | 9.9 (-10, 51, -1) / 8.6 (7, 59, -7)                  |
|                                                                        | Inferior frontal gyrus              | 5659 / 5956                   | 7.8 (-42, 20, -5) / 8.3 (42, 23, -4)                 |
|                                                                        | Medial frontal gyrus                | 5778 / 5333                   | 10.7 (-6, 50, 9) / 9.7 (4, 52, 13)                   |
|                                                                        | Precentral gyrus                    | 4267 / 4237                   | 6.9 (-49, -11, 10) / 7.3 (43, -5, 43)                |
|                                                                        | Paracentral lobule                  | 889 / 1037                    | 7.6 (-7, -14, 44) / 8.1 (9, -24, 44)                 |
|                                                                        | Rectal gyrus                        | 593 / 622                     | 8.4 (-1, 37, -21) / 8.2 (4, 37, -20)                 |
|                                                                        | Orbital gyrus                       | 207 / 237                     | 8.7 (-3, 44, -19) / 7.8 (3, 46, -20)                 |
|                                                                        |                                     | <b><i>Cingulate gyrus</i></b> |                                                      |
|                                                                        | Cingulate gyrus (BA 23, 24, 31, 32) | 4148 / 3970                   | 8.7 (-7, 13, 37) / 8.6 (9, -24, 39)                  |

---

|                           |             |                                          |
|---------------------------|-------------|------------------------------------------|
| Anterior cingulate        | 1926 / 1985 | 10.0 (-6, 54, -1) / 9.3 (7, 47, 9)       |
| Posterior cingulate       | 1422 / 1452 | 7.2 (-7, -59, 13) / 7.3 (9, -56, 10)     |
| <b><i>Insula</i></b>      | 3615 / 3911 | 7.1 (-40, 20, 0) / 7.5 (39, 20, 2)       |
| <b><i>Temporal</i></b>    |             |                                          |
| Middle temporal gyrus     | 5985 / 6874 | 6.3 (-58, -14, -8) / 6.5 (64, -36, 2)    |
| Superior temporal gyrus   | 5570 / 5867 | 6.8 (-52, -10, 7) / 6.9 (48, 3, 1)       |
| Parahippocampal gyrus     | 3526 / 4178 | 8.0 (-31, -15, -16) / 7.3 (30, -16, -19) |
| Fusiform gyrus            | 2696 / 2252 | 6.6 (-49, -17, -26) / 6.4 (37, -17, -23) |
| Inferior temporal gyrus   | 1985 / 1926 | 6.5 (-52, -17, -28) / 6.6 (49, -69, -2)  |
| Uncus                     | 948 / 681   | 7.1 (-30, -2, -19) / 6.6 (37, -16, -27)  |
| Transverse temporal gyrus | 356 / 296   | 6.7 (-50, -16, 10) / 6.8 (56, -20, 12)   |
| <b><i>Parietal</i></b>    |             |                                          |
| Precuneus                 | 5333 / 5570 | 7.0 (-1, -60, 18) / 6.9 (3, -60, 20)     |
| Inferior parietal lobule  | 1896 / 3674 | 5.1 (-59, -40, 23) / 6.8 (55, -25, 22)   |
| Postcentral gyrus         | 1393 / 3644 | 6.5 (-50, -12, 14) / 7.2 (56, -23, 15)   |

---

---

|                          |            |                                        |
|--------------------------|------------|----------------------------------------|
| Supramarginal gyrus      | 770 / 1244 | 4.8 (-10, -63, 54) / 5.7 (28, -72, 45) |
| Superior parietal lobule | 830 / 1067 | 4.9 (-59, -42, 26) / 6.2 (55, -57, 30) |
| Angular gyrus            | 504 / 415  | 3.7 (-45, -71, 35) / 6.3 (53, -57, 35) |

***Occipital***

|                          |             |                                        |
|--------------------------|-------------|----------------------------------------|
| Cuneus                   | 3615 / 3289 | 7.1 (-9, -59, 8) / 7.0 (9, -59, 7)     |
| Lingual gyrus            | 2726 / 3289 | 6.3 (-12, -55, 4) / 6.9 (12, -54, 4)   |
| Middle occipital gyrus   | 2519 / 2281 | 5.3 (-28, -88, 14) / 6.4 (52, -66, -3) |
| Inferior occipital gyrus | 830 / 711   | 3.9 (-46, -79, -1) / 5.8 (43, -72, -4) |
| Superior occipital gyrus | 296 / 207   | 3.5 (-31, -78, 33) / 5.2 (33, -79, 30) |

***Basal ganglia***

|                   |           |                                      |
|-------------------|-----------|--------------------------------------|
| Caudate           | - / 711   | - / 5.2 (36, -15, -9)                |
| Clastrum          | 237 / 385 | 6.3 (-34, 3, 5) / 6.6 (30, 20, -1)   |
| Lentiform Nucleus | 237 / 267 | 3.7 (-28, -5, 11) / 3.9 (16, 5, -10) |

|                        |             |                                    |
|------------------------|-------------|------------------------------------|
| <b><i>Thalamus</i></b> | 1304 / 1630 | 6.1 (-3, -10, 2) / 5.9 (3, -10, 2) |
|------------------------|-------------|------------------------------------|

---

---

**Cerebellum**

|                            |             |                                          |
|----------------------------|-------------|------------------------------------------|
| Culmen                     | 2193 / 2459 | 5.5 (-19, -27, -15) / 5.8 (9, -54, 1)    |
| Declive                    | 1037 / 1570 | 4.3 (-16, -59, -18) / 4.6 (25, -62, -11) |
| Inferior semi-lunar lobule | - / 711     | - / 3.7 (25, -65, -41)                   |
| Uvula                      | - / 415     | - / 3.6 (28, -65, -23)                   |
| Pyramis                    | - / 356     | - / 3.3 (24, -73, -27)                   |
| Cerebellar tonsil          | - / 326     | - / 3.9 (25, -60, -42)                   |

---

**HC – Relatives with  
Psychosis  
Spectrum  
Personality  
Disorders**

|                        |             |                                      |
|------------------------|-------------|--------------------------------------|
| <b>Frontal</b>         |             |                                      |
| Superior frontal gyrus | 3704 / 2133 | 4.8 (-9, 62, -11) / 4.3 (39, 50, 14) |
| Medial frontal gyrus   | 3556 / 2637 | 4.8 (-9, 49, 10) / 4.3 (6, 37, -14)  |
| Middle frontal gyrus   | 3378 / 2578 | 4.8 (-33, 54, 4) / 4.4 (36, 50, 11)  |
| Inferior frontal gyrus | 1600 / 1037 | 4.7 (-43, 48, 2) / 3.7 (46, 28, -3)  |
| Precentral gyrus       | 1185 / 770  | 5.5 (-56, -5, 11) / 4.3 (58, -7, 11) |
| Paracentral lobule     | - / 237     | - / 3.7 (9, -24, 43)                 |
| Rectal gyrus           | 241/ -      | 3.7 (-1, 25, -19) / -                |

---

---

***Cingulate gyrus***

|                                    |             |                                      |
|------------------------------------|-------------|--------------------------------------|
| Cingulate gyrus (BA 9, 24, 31, 32) | 2370 / 2726 | 4.2 (-9, -11, 36) / 4.9 (10, 28, 28) |
| Anterior cingulate                 | 1215 / 1067 | 4.9 (-7, 44, 3) / 4.7 (10, 30, 25)   |
| Posterior cingulate                | 770 / 326   | 3.9 (-3, -58, 14) / 3.7 (3, -55, 14) |

***Temporal***

|                           |             |                                          |
|---------------------------|-------------|------------------------------------------|
| Middle temporal gyrus     | 4415 / 2400 | 5.0 (-59, -44, -2) / 4.7 (55, -57, -8)   |
| Superior temporal gyrus   | 2963 / 1363 | 5.2 (-59, -5, 9) / 3.9 (56, -10, 9)      |
| Inferior temporal gyrus   | 1778 / 889  | 4.9 (-64, -46, -8) / 4.7 (55, -60, -6)   |
| Fusiform gyrus            | 1304 / 1689 | 4.7 (-48, -44, -13) / 4.5 (34, -34, -17) |
| Parahippocampal gyrus     | 415 / 1037  | 4.2 (-31, -10, -26) / 4.3 (28, -51, -6)  |
| Uncus                     | 711 / 119   | 4.5 (-33, -13, -28) / 3.7 (33, -14, -27) |
| Transverse temporal gyrus | - / 237     | - / 4.4 (62, -8, 13)                     |

***Parietal***

|                          |            |                                        |
|--------------------------|------------|----------------------------------------|
| Postcentral gyrus        | 711 / 1689 | 5.2 (-59, -5, 14) / 4.6 (58, -14, 16)  |
| Precuneus                | 859 / 385  | 3.8 (-10, -46, 45) / 3.5 (42, -67, 36) |
| Inferior parietal lobule | 504 / 741  | 3.8 (-55, -33, 43) / 3.8 (64, -23, 26) |

---



|                          |            |                                          |
|--------------------------|------------|------------------------------------------|
| Supramarginal gyrus      | 296 / -    | 3.9 (-52, -51, 23) / -                   |
| Angular gyrus            | - / 296    | - / 3.8 (42, -62, 35)                    |
| <b><i>Occipital</i></b>  |            |                                          |
| Middle occipital gyrus   | 119 / 563  | 4.0 (-53, -63, -8) / 4.6 (52, -63, -6)   |
| Lingual gyrus            | - / 533    | - / 4.0 (27, -60, -6)                    |
| <b><i>Cerebellum</i></b> |            |                                          |
| Declive                  | 207 / 1037 | 3.4 (-28, -66, -21) / 3.9 (34, -65, -11) |
| Culmen                   | 326 / 622  | 3.7 (-39, -42, -19) / 4.3 (34, -37, -20) |

---

**The psychosis dimension groups comparisons**

---

|                                                   |                        |             |                                      |
|---------------------------------------------------|------------------------|-------------|--------------------------------------|
| <b>Non-Psychotic<br/>Relatives –<br/>Probands</b> | <b><i>Frontal</i></b>  |             |                                      |
|                                                   | Middle frontal gyrus   | 7052 / 8207 | 8.1 (-36, 34, 11) / 8.6 (31, 52, 18) |
|                                                   | Superior frontal gyrus | 5719 / 6400 | 9.2 (-10, 52, -1) / 8.6 (24, 47, 17) |
|                                                   | Inferior frontal gyrus | 5244 / 5659 | 8.3 (-33, 32, -9) / 9.0 (43, 22, -5) |
|                                                   | Medial frontal gyrus   | 5333 / 5037 | 9.6 (-1, 57, -3) / 9.4 (3, 57, -4)   |

---

---

|                                     |             |                                          |
|-------------------------------------|-------------|------------------------------------------|
| Precentral gyrus                    | 4681 / 4770 | 7.1 (-43, 3, 7) / 7.2 (45, 18, 35)       |
| Paracentral lobule                  | 1037 / 1126 | 7.4 (-3, -21, 43) / 7.5 (4, -23, 43)     |
| Rectal gyrus                        | 622 / 504   | 9.0 (-1, 33, -19) / 9.1 (6, 30, -19)     |
| Orbital gyrus                       | 237 / 326   | 8.8 (-3, 40, -21) / 8.9 (4, 43, -19)     |
| <br><b><i>Cingulate gyrus</i></b>   |             |                                          |
| Cingulate gyrus (BA 23, 24, 31, 32) | 3763 / 3615 | 7.8 (-9, 12, 39) / 8.0 (12, 18, 36)      |
| Anterior cingulate                  | 1926 / 1807 | 9.4 (-1, 52, -1) / 8.9 (4, 54, -1)       |
| Posterior cingulate                 | 1304 / 1393 | 5.5 (-4, -62, 14) / 5.5 (6, -59, 24)     |
| <br><b><i>Insula</i></b>            |             |                                          |
|                                     | 3259 / 3022 | 7.9 (-40, 17, -2) / 7.9 (40, 16, -2)     |
| <br><b><i>Temporal</i></b>          |             |                                          |
| Middle temporal gyrus               | 6519 / 6400 | 6.8 (-62, -18, -7) / 7.0 (64, -26, -2)   |
| Superior temporal gyrus             | 5719 / 5867 | 7.2 (-56, -3, 3) / 7.4 (50, 0, 3)        |
| Parahippocampal gyrus               | 3259 / 3230 | 5.7 (-34, -14, -18) / 5.7 (19, 6, -17)   |
| Fusiform gyrus                      | 2074 / 2133 | 4.9 (-48, -19, -24) / 5.1 (48, -19, -24) |
| Inferior temporal gyrus             | 2074 / 1630 | 5.3 (-55, -15, -16) / 5.8 (59, -8, -16)  |

---

---

|       |           |                                        |
|-------|-----------|----------------------------------------|
| Uncus | 622 / 504 | 4.6 (-36, -13, -27) / 5.1 (28, 6, -22) |
|-------|-----------|----------------------------------------|

|                           |           |                                        |
|---------------------------|-----------|----------------------------------------|
| Transverse temporal gyrus | 326 / 385 | 6.9 (-61, -18, 11) / 7.3 (56, -20, 13) |
|---------------------------|-----------|----------------------------------------|

***Parietal***

|           |             |                                      |
|-----------|-------------|--------------------------------------|
| Precuneus | 5452 / 5393 | 6.0 (-4, -34, 45) / 6.7 (6, -33, 43) |
|-----------|-------------|--------------------------------------|

|                          |             |                                        |
|--------------------------|-------------|----------------------------------------|
| Inferior parietal lobule | 3733 / 3763 | 6.2 (-59, -42, 24) / 6.9 (59, -27, 22) |
|--------------------------|-------------|----------------------------------------|

|                   |             |                                        |
|-------------------|-------------|----------------------------------------|
| Postcentral gyrus | 2133 / 3763 | 6.1 (-49, -11, 17) / 7.5 (56, -22, 16) |
|-------------------|-------------|----------------------------------------|

|                          |             |                                        |
|--------------------------|-------------|----------------------------------------|
| Superior parietal lobule | 1126 / 1244 | 5.2 (-34, -65, 50) / 6.0 (28, -73, 47) |
|--------------------------|-------------|----------------------------------------|

|                     |           |                                        |
|---------------------|-----------|----------------------------------------|
| Supramarginal gyrus | 919 / 889 | 6.2 (-55, -46, 22) / 6.0 (58, -45, 23) |
|---------------------|-----------|----------------------------------------|

|               |           |                                        |
|---------------|-----------|----------------------------------------|
| Angular gyrus | 563 / 356 | 5.1 (-49, -68, 32) / 5.0 (36, -76, 33) |
|---------------|-----------|----------------------------------------|

***Occipital***

|        |             |                                      |
|--------|-------------|--------------------------------------|
| Cuneus | 2874 / 3052 | 5.4 (0, -66, 30) / 5.8 (30, -78, 33) |
|--------|-------------|--------------------------------------|

|               |             |                                        |
|---------------|-------------|----------------------------------------|
| Lingual gyrus | 2933 / 2815 | 5.0 (-25, -82, -3) / 5.8 (27, -82, -3) |
|---------------|-------------|----------------------------------------|

|                        |             |                                        |
|------------------------|-------------|----------------------------------------|
| Middle occipital gyrus | 2459 / 2193 | 5.5 (-25, -87, 15) / 5.5 (33, -78, 18) |
|------------------------|-------------|----------------------------------------|

|                          |           |                                        |
|--------------------------|-----------|----------------------------------------|
| Inferior occipital gyrus | 830 / 741 | 4.8 (-30, -79, -4) / 5.2 (30, -82, -6) |
|--------------------------|-----------|----------------------------------------|

|                          |           |                                        |
|--------------------------|-----------|----------------------------------------|
| Superior occipital gyrus | 296 / 207 | 5.0 (-34, -79, 32) / 5.9 (31, -80, 29) |
|--------------------------|-----------|----------------------------------------|

---

|                                      |                            |             |                                          |
|--------------------------------------|----------------------------|-------------|------------------------------------------|
| <b>Basal ganglia</b>                 |                            |             |                                          |
|                                      | Caudate                    | 237 / 504   | 4.5 (-7, 14, -6) / 5.1 (9, 17, -6)       |
|                                      | Lentiform nucleus          | 296 / 415   | 4.0 (-31, -18, -5) / 4.6 (12, 6, -4)     |
|                                      | Clastrum                   | 237 / 267   | 5.6 (-31, 13, 2) / 6.0 (30, 16, 2)       |
|                                      | <b>Thalamus</b>            | 1363 / 1600 | 8.4 (-6, -10, 3) / 7.6 (6, -10, 1)       |
| <b>Cerebellum</b>                    |                            |             |                                          |
|                                      | Culmen                     | 1926 / 1807 | 4.3 (-6, -58, 0) / 4.6 (18, -27, -14)    |
|                                      | Inferior semi-lunar lobule | - / 444     | 3.6 (-1, -60, -41) / 4.0 (3, -59, -42)   |
|                                      | Declive                    | 356 / 385   | 3.1 (-19, -66, -22) / 3.2 (25, -63, -11) |
|                                      | Cerebellar tonsil          | 207 / 385   | 3.4 (-1, -52, -42) / 3.6 (3, -53, -41)   |
| <b>Non-Psychotic<br/>Relatives –</b> | <b>Frontal</b>             |             |                                          |
|                                      | Superior frontal gyrus     | 3141 / 1630 | 4.3 (-31, 47, 16) / 4.6 (24, 47, 17)     |
| <b>Relatives with<br/>Psychosis</b>  | Middle frontal gyrus       | 2933 / 2489 | 4.5 (-31, 44, 13) / 4.4 (24, 50, 13)     |
| <b>Spectrum<br/>Personality</b>      | Medial frontal gyrus       | 2785 / 1244 | 4.2 (-9, 22, -18) / 4.1 (9, 37, -14)     |

|                               |                             |            |                                          |
|-------------------------------|-----------------------------|------------|------------------------------------------|
| <b>Disorders</b>              | Inferior frontal gyrus      | 1067 / -   | 4.2 (-42, -50, 2) / 3.6 (46, 29, -3)     |
|                               | Precentral gyrus            | 859 / 533  | 5.2 (-56, -5, 11) / 4.4 (58, -7, 13)     |
|                               | Rectal gyrus                | 385 / -    | 4.2 (-9, 19, -21) / 4.0 (3, 27, -19)     |
| <b><i>Cingulate gyrus</i></b> |                             |            |                                          |
|                               | Anterior cingulate          | 444 / 119  | 3.7 (-12, 36, 22) / 3.8 (12, 33, 23)     |
|                               | Cingulate gyrus (BA 31, 32) | 356 / 387  | 3.9 (-13, -42, 41) / 4.4 (12, 28, 29)    |
| <b><i>Temporal</i></b>        |                             |            |                                          |
|                               | Middle temporal gyrus       | 3052 / 593 | 4.6 (-58, -42, -3) / 4.1 (53, -44, -12)  |
|                               | Superior temporal gyrus     | 1985 / 770 | 5.1 (-59, -3, 7) / 4.0 (61, -2, 8)       |
|                               | Inferior temporal gyrus     | 919 / 444  | 4.4 (-52, -52, -14) / 4.2 (55, -49, -11) |
|                               | Fusiform gyrus              | 356 / 504  | 4.1 (-49, -49, -14) / 3.9 (55, -50, -15) |
|                               | Transverse temporal gyrus   | - / 237    | - / 4.4 (59, -11, 13)                    |
| <b><i>Parietal</i></b>        |                             |            |                                          |
|                               | Postcentral gyrus           | 356 / 1541 | 4.8 (-56, -8, 14) / 4.5 (56, -9, 16)     |
|                               | Inferior parietal lobule    | 741 / 267  | 4.3 (-55, -33, 42) / 3.7 (45, -29, 41)   |

---

|                         |         |                        |
|-------------------------|---------|------------------------|
| Supramarginal gyrus     | 504 / - | 4.3 (-55, -51, 23) / - |
| Precuneus               | 474 / - | 4.0 (-12, -44, 44) / - |
| <b><i>Occipital</i></b> |         |                        |
| Middle occipital gyrus  | - / 237 | - / 3.8 ( 53, -61, -6) |

---

\* Coordinates for peak  $t$  values are reported based of Group ICA for fMRI Toolbox, GIFT1.3i. All outcomes are presented at  $p=.005$ , False Discovery Rate-corrected,  $k=200$  voxels threshold.

BA – Brodmann area

**Table S3. Regions of gray matter volume difference between the DSM-IV diagnoses proband and healthy control groups based on Voxel-Based Morphometry**

| Group comparison                                                  | Brain region                        | Volume (Voxels)               | Maximum <i>t</i> ( Talairach coordinates: x, y, z)* |
|-------------------------------------------------------------------|-------------------------------------|-------------------------------|-----------------------------------------------------|
|                                                                   |                                     | Left / Right                  | Left / Right                                        |
| <b>The DSM-IV proband groups vs. healthy controls comparisons</b> |                                     |                               |                                                     |
| <b>Healthy Controls – Probands with Schizophrenia</b>             | <b><i>Frontal</i></b>               |                               |                                                     |
|                                                                   | Middle frontal gyrus                | 6252 / 7200                   | 8.6 (-28, 51, -4) / 7.5 (36, 50, 10)                |
|                                                                   | Superior frontal gyrus              | 5185 / 5985                   | 9.2 (-10, 51, -1) / 8.0 (6, 63, -2)                 |
|                                                                   | Inferior frontal gyrus              | 4919 / 5867                   | 8.1 (-36, 17, -11) / 9.0 (43, 22, -4)               |
|                                                                   | Medial frontal gyrus                | 5244 / 4919                   | 9.9 (-4, 47, 10) / 9.0 (6, 46, 12)                  |
|                                                                   | Precentral gyrus                    | 4296 / 4237                   | 7.0 (-46, -10, 9) / 8.0 (52, 18, 7)                 |
|                                                                   | Paracentral lobule                  | 830 / 741                     | 7.0 (-9, -12, 45) / 7.5 (7, -14, 44)                |
|                                                                   | Rectal gyrus                        | 504 / 533                     | 8.2 (-3, 35, -19) / 8.0 (4, 34, -19)                |
|                                                                   | Orbital gyrus                       | 237 / 296                     | 8.2 (-1, 44, -20) / 8.1 (4, 40, -20)                |
|                                                                   |                                     | <b><i>Cingulate gyrus</i></b> |                                                     |
|                                                                   | Cingulate gyrus (BA 23, 24, 31, 32) | 3970 / 3407                   | 8.9 (-4, 20, 28) / 8.8 (7, 29, 28)                  |
|                                                                   | Anterior cingulate                  | 2015 / 1956                   | 10.1 (-4, 47, 6) / 9.2 (6, 48, 3)                   |
|                                                                   | Posterior cingulate                 | 1541 / 1511                   | 6.1 (-9, -61, 11) / 6.5 (10, -56, 10)               |

---

|                           |             |                                          |
|---------------------------|-------------|------------------------------------------|
| <b><i>Insula</i></b>      | 3081 / 3319 | 7.3 (-36, 14, -5) / 8.2 (42, 14, -2)     |
| <b><i>Temporal</i></b>    |             |                                          |
| Middle temporal gyrus     | 5778 / 6193 | 6.1 (-62, -35, -2) / 7.4 (64, -36, 3)    |
| Superior temporal gyrus   | 5719 / 5778 | 7.8 (-31, 4, -15) / 7.8 (33, 6, -17)     |
| Parahippocampal gyrus     | 3496 / 3526 | 8.2 (-30, -14, -14) / 7.8 (31, -13, -17) |
| Fusiform gyrus            | 2281 / 1807 | 6.3 (-27, -56, -7) / 6.2 (27, -62, -8)   |
| Inferior temporal gyrus   | 1896 / 1837 | 5.5 (-56, -16, -27) / 6.0 (39, -9, -37)  |
| Uncus                     | 800 / 711   | 7.5 (-30, 3, -20) / 7.7 (31, 3, -19)     |
| Transverse temporal gyrus | 296 / 356   | 6.5 (-52, -16, 10) / 6.8 (61, -15, 13)   |
| <b><i>Parietal</i></b>    |             |                                          |
| Precuneus                 | 4770 / 5037 | 5.8 (-3, -62, 18) / 6.0 (10, -59, 18)    |
| Inferior parietal lobule  | 830 / 3496  | 5.2 (-49, -46, 22) / 6.6 (62, -26, 25)   |
| Postcentral gyrus         | 1363 / 2667 | 6.1 (-50, -15, 15) / 7.1 (59, -20, 15)   |
| Superior parietal lobule  | 296 / 741   | 3.8 (-10, -64, 54) / 4.3 (24, -69, 44)   |
| Supramarginal gyrus       | 652 / 889   | 5.1 (-52, -48, 22) / 5.3 (52, -54, 23)   |
| Angular gyrus             | 148 / 356   | 3.2 (-34, -74, 30) / 5.0 (50, -58, 36)   |

---



---

***Occipital***

|                          |             |                                        |
|--------------------------|-------------|----------------------------------------|
| Lingual gyrus            | 3111 / 2548 | 6.2 (-27, -60, -6) / 6.8 (27, -59, -6) |
| Cuneus                   | 2815 / 2933 | 5.9 (-9, -58, 8) / 6.1 (9, -59, 7)     |
| Middle occipital gyrus   | 2193 / 1867 | 4.8 (-45, -73, 4) / 5.6 (52, -63, -6)  |
| Inferior occipital gyrus | 593 / 652   | 3.8 (-42, -72, -4) / 5.7 (28, -82, -6) |
| Superior occipital gyrus | 296 / 119   | 3.5 (-34, -81, 32) / 4.3 (33, -80, 26) |

***Basal ganglia***

|                   |           |                                       |
|-------------------|-----------|---------------------------------------|
| Caudate           | 741 / 830 | 4.3 (-10, 15, 10) / 5.2 (6, 14, -3)   |
| Clastrum          | 356 / 652 | 4.2 (-24, -10, -6) / 4.6 (28, -9, -6) |
| Lentiform nucleus | 356 / 415 | 6.1 (-36, -19, -2) / 6.2 (30, 17, -2) |

***Thalamus***

|  |             |                                      |
|--|-------------|--------------------------------------|
|  | 1719 / 1896 | 7.0 (-7, -11, 10) / 6.4 (9, -14, 10) |
|--|-------------|--------------------------------------|

***Cerebellum***

|                            |             |                                          |
|----------------------------|-------------|------------------------------------------|
| Culmen                     | 2252 / 2459 | 5.8 (-16, -30, -11) / 6.3 (18, -37, -10) |
| Declive                    | 1689 / 1630 | 5.5 (-28, -53, -11) / 5.6 (27, -65, -11) |
| Inferior semi-lunar lobule | 770 / 1393  | 3.4 (-28, -73, -42) / 5.1 (18, -71, -42) |

---

---

|                   |           |                                          |
|-------------------|-----------|------------------------------------------|
| Pyramis           | 622 / 859 | 3.4 (0, -65, -23) / 4.6 (22, -73, -27)   |
| Uvula             | 444 / 830 | 3.5 (-24, -64, -25) / 4.8 (34, -77, -25) |
| Tuber             | 237 / 593 | 3.2 (-33, -71, -30) / 4.7 (37, -74, -25) |
| Cerebellar tonsil | 89 / 326  | 3.0 (-30, -66, -33) / 4.0 (24, -60, -40) |

---

**Healthy  
Controls –  
Probands with  
Schizoaffective  
Disorder**

***Frontal***

|                        |             |                                      |
|------------------------|-------------|--------------------------------------|
| Middle frontal gyrus   | 6726 / 7378 | 7.5 (-30, 54, 3) / 6.8 (25, 55, -8)  |
| Superior frontal gyrus | 5096 / 6015 | 7.8 (-27, 55, 0) / 7.5 (7, 61, -2)   |
| Inferior frontal gyrus | 5037 / 5422 | 6.7 (-40, 50, 0) / 6.6 (46, 33, -13) |
| Medial frontal gyrus   | 5363 / 5096 | 9.0 (-4, 50, 9) / 8.2 (4, 53, 15)    |
| Precentral gyrus       | 3644 / 4089 | 5.7 (-56, 11, 11) / 5.8 (49, 3, 37)  |
| Paracentral lobule     | 1037 / 1304 | 6.6 (-6, -15, 44) / 7.1 (7, -28, 43) |
| Rectal gyrus           | 593 / 590   | 6.9 (-1, 33, -19) / 6.6 (3, 34, -21) |
| Orbital gyrus          | 296 / 237   | 7.5 (-3, 46, -19) / 6.9 (3, 43, -19) |

***Cingulate gyrus***

|                                     |             |                                     |
|-------------------------------------|-------------|-------------------------------------|
| Cingulate gyrus (BA 23, 24, 31, 32) | 3496 / 3407 | 7.0 (-6, 14, 38) / 7.4 (7, -26, 40) |
| Anterior cingulate                  | 1985 / 1778 | 8.4 (-7, 52, -1) / 7.4 (6, 49, -1)  |

---

---

|                           |             |                                          |
|---------------------------|-------------|------------------------------------------|
| Posterior cingulate       | 1659 / 1304 | 6.8 (-6, -59, 13) / 6.8 (7, -56, 12)     |
| <b><i>Insula</i></b>      | 3052 / 3022 | 6.0 (-43, 10, 1) / 5.8 (43, -1, 8)       |
| <b><i>Temporal</i></b>    |             |                                          |
| Middle temporal gyrus     | 5630 / 6459 | 5.9 (-59, -14, -8) / 5.9 (39, -75, 22)   |
| Superior temporal gyrus   | 5126 / 5393 | 5.8 (-49, 1, 0) / 5.9 (53, -58, 28)      |
| Parahippocampal gyrus     | 3496 / 3793 | 6.1 (-30, -17, -18) / 5.9 (30, -16, -21) |
| Fusiform gyrus            | 2430 / 2015 | 5.4 (-49, -20, -24) / 5.3 (39, -17, -26) |
| Inferior temporal gyrus   | 1926 / 1689 | 5.4 (-49, -17, -27) / 6.1 (49, -70, -2)  |
| Uncus                     | 830 / 770   | 5.6 (-34, -13, -27) / 5.3 (36, -12, -28) |
| Transverse temporal gyrus | 444 / 326   | 5.5 (-55, -13, 10) / 5.8 (56, -21, 13)   |
| <b><i>Parietal</i></b>    |             |                                          |
| Precuneus                 | 5037 / 5126 | 6.6 (-1, -60, 20) / 6.7 (4, -59, 20)     |
| Inferior parietal lobule  | 1956 / 3378 | 5.1 (-58, -40, 24) / 6.1 (50, -59, 38)   |
| Postcentral gyrus         | 1126 / 2815 | 5.2 (-50, -24, 14) / 6.0 (56, -24, 16)   |
| Supramarginal gyrus       | 770 / 859   | 4.5 (-59, -44, 26) / 6.1 (53, -58, 32)   |
| Superior parietal lobule  | 800 / 771   | 5.1 (-7, -63, 56) / 5.7 (27, -74, 44)    |

---

---

|                             |             |                                          |
|-----------------------------|-------------|------------------------------------------|
| Angular gyrus               | 415 / 385   | 3.6 (-50, -65, 32) / 6.2 (53, -56, 36)   |
| <b><i>Occipital</i></b>     |             |                                          |
| Cuneus                      | 3141 / 3200 | 6.2 (-9, -62, 7) / 6.3 (10, -59, 7)      |
| Lingual gyrus               | 3022 / 3081 | 6.0 (-9, -60, 4) / 6.2 (10, -57, 4)      |
| Middle occipital gyrus      | 1985 / 1867 | 4.6 (-43, -76, 3) / 6.1 (49, -69, -3)    |
| Inferior occipital gyrus    | 593 / 596   | 4.1 (-45, -76, -1) / 5.6 (45, -76, -5)   |
| Superior occipital gyrus    | 237 / 119   | 3.3 (-34, -86, 22) / 5.9 (33, -77, 33)   |
| <b><i>Basal ganglia</i></b> |             |                                          |
| Clastrum                    | 326 / 119   | 4.8 (-33, 6, 5) / 4.8 (36, -4, 7)        |
| <b><i>Thalamus</i></b>      |             |                                          |
|                             | 533 / 830   | 4.4 (-3, -10, 9) / 4.4 (4, -9, 3)        |
| <b><i>Cerebellum</i></b>    |             |                                          |
| Culmen                      | 1896 / 1985 | 4.6 (-9, -51, 1) / 5.5 (10, -54, -1)     |
| Declive                     | 978 / 1452  | 4.1 (-31, -68, -12) / 4.5 (25, -63, -11) |
| Tuber                       | - / 356     | - / 3.5 (39, -74, -23)                   |
| Inferior semi-lunar lobule  | - / 267     | - / 3.4 (28, -62, -42)                   |

---

|                                                                                      |                                     |             |                                          |
|--------------------------------------------------------------------------------------|-------------------------------------|-------------|------------------------------------------|
|                                                                                      | Uvula                               | - / 296     | 2.8 (-27, -65, -24) / 3.7 (34, -62, -23) |
|                                                                                      | Cerebellar tonsil                   | - / 237     | - / 3.6 (34, -41, -31)                   |
| <b>Healthy Controls –<br/>Probands with<br/>Psychotic<br/>Bipolar I<br/>Disorder</b> | <b>Frontal</b>                      |             |                                          |
|                                                                                      | Medial frontal gyrus                | 2341 / 2904 | 5.1 (-4, 50, 3) / 5.3 (4, 50, 15)        |
|                                                                                      | Inferior frontal gyrus              | 1719 / 2252 | 4.6 (-30, 8, -18) / 4.8 (31, 8, -16)     |
|                                                                                      | Precentral gyrus                    | - / 2074    | - / 5.3 (43, -7, 42)                     |
|                                                                                      | Middle frontal gyrus                | 563 / 1244  | 4.0 (-33, 39, -13) / 4.6 (36, -5, 43)    |
|                                                                                      | Superior frontal gyrus              | 444 / 1067  | 4.3 (-12, 52, -1) / 4.3 (21, 57, -5)     |
|                                                                                      | <b>Cingulate gyrus</b>              |             |                                          |
|                                                                                      | Cingulate gyrus (BA 23, 24, 31, 32) | 2489 / 3022 | 4.3 (-6, -23, 36) / 4.9 (12, -10, 38)    |
|                                                                                      | Anterior cingulate                  | 830 / 859   | 5.2 (-4, 48, 7) / 5.2 (6, 46, -4)        |
|                                                                                      | Posterior cingulate                 | 652 / 563   | 4.2 (-3, -44, 20) / 4.3 (3, -48, 23)     |
|                                                                                      | <b>Insula</b>                       | 1274 / 1807 | 4.0 (-39, -1, 7) / 4.6 (45, -4, 8)       |
|                                                                                      | <b>Temporal</b>                     |             |                                          |

|                        |                         |             |                                       |
|------------------------|-------------------------|-------------|---------------------------------------|
|                        | Parahippocampal gyrus   | 1719 / 1304 | 5.3 (-31, -1, -20) / 4.6 (29, 5, -17) |
|                        | Superior temporal gyrus | 563 / 1422  | 5.1 (-34, -2, -18) / 5.0 (33, 5, -18) |
|                        | Uncus                   | 237 / -     | 5.1 (-28, 2, -22) / -                 |
| <b><i>Parietal</i></b> |                         |             |                                       |
|                        | Precuneus               | 237 / -     | 3.8 (-13, -45, 40) / -                |
|                        | Postcentral gyrus       | - / 207     | - / 3.7 (53, -7, 14)                  |

---

**The DSM-IV proband groups comparisons**

---

|                                                                 |                        |             |                                       |
|-----------------------------------------------------------------|------------------------|-------------|---------------------------------------|
| <b>Probands with<br/>Psychotic<br/>Bipolar I<br/>Disorder –</b> | <b><i>Frontal</i></b>  |             |                                       |
|                                                                 | Middle frontal gyrus   | 2667 / 830  | 4.5 (-43, 48, -7) / 4.2 (39, 53, 11)  |
|                                                                 | Inferior frontal gyrus | 2281 / 1570 | 4.4. (-52, 11, 22) / 4.7 (58, 20, 11) |
| <b>Probands with<br/>Schizophrenia</b>                          | Medial frontal gyrus   | 1867 / -    | 4.7 (-12, 40, 12) / 3.4 (4, 41, -17)  |
|                                                                 | Superior frontal gyrus | 1837 / 356  | 4.2 (-25, 20, 49) / 4.0 (40, 50, 14)  |
|                                                                 | Precentral gyrus       | 622 / 207   | 4.4 (-55, 15, 6) / 4.2 (52, 18, 9)    |
| <b><i>Cingulate gyrus</i></b>                                   |                        |             |                                       |
|                                                                 | Anterior cingulate     | 1304 / 563  | 5.3 (-6, 33, 11) / 4.2 (3, 26, 17)    |

---

---

|                             |            |                                        |
|-----------------------------|------------|----------------------------------------|
| Cingulate gyrus (BA 24, 32) | 978 / 563  | 4.6 (-3, 13, 28) / 4.1 (3, 13, 28)     |
| <b><i>Temporal</i></b>      |            |                                        |
| Middle temporal gyrus       | 652 / 1244 | 4.2 (-65, -35, -3) / 4.4 (65, -38, 2)  |
| Parahippocampal gyrus       | 504 / 978  | 3.7 (-21, -37, -3) / 4.4 (21, -37, -4) |
| Superior temporal gyrus     | 652 / 356  | 4.0 (-55, -50, 12) / 4.0 (64, -36, 6)  |
| Fusiform gyrus              | - / 652    | - / 4.4 (43, -56, -12)                 |
| <b><i>Parietal</i></b>      |            |                                        |
| Precuneus                   | - / 1363   | - / 4.1 (22, -68, 30)                  |
| Inferior parietal lobule    | - / 711    | - / 4.3 (59, -30, 33)                  |
| Superior parietal lobule    | - / 267    | - / 3.9 (22, -61, 56)                  |
| <b><i>Occipital</i></b>     |            |                                        |
| Lingual gyrus               | - / 830    | - / 4.3 (30, -75, -10)                 |
| Middle occipital gyrus      | - / 356    | - / 4.1 (34, -75, -10)                 |
| Cuneus                      | - / 296    | - / 4.1 (22, -71, 33)                  |
| <b><i>Thalamus</i></b>      | 326 / -    | 3.7 (-6, -10, 13) / -                  |

---

---

**Cerebellum**

|         |         |                        |
|---------|---------|------------------------|
| Declive | - / 711 | - / 4.1(33, -66, -12)  |
| Tuber   | - / 326 | - / 4.2 (37, -75, -24) |
| Uvula   | - / 267 | - / 4.2 (33, -77, -23) |

---

**Probands with  
Psychotic  
Bipolar I  
Disorder –**

**Frontal**

|                        |             |                                      |
|------------------------|-------------|--------------------------------------|
| Middle frontal gyrus   | 4563 / 1926 | 5.2 (-31, 45, 21) / 4.6 (25, 41, 34) |
| Superior frontal gyrus | 3881 / 4207 | 5.0 (-30, 45, 17) / 4.7 (12, 49, 28) |

**Probands with  
Schizoaffective  
Disorder**

|                        |             |                                       |
|------------------------|-------------|---------------------------------------|
| Medial frontal gyrus   | 3911 / 2341 | 4.5 (-7, 54, 10) / 4.6 (4, 4, 59)     |
| Inferior frontal gyrus | 2015 / 978  | 4.6 (-49, 11, 24) / 4.5 (15, 19, -20) |
| Paracentral lobule     | 563 / 711   | 3.9 (-1, -28, 48) / 4.0 (4, -36, 57)  |
| Rectal gyrus           | 593 / 652   | 4.9 (-3, 15, -22) / 4.9 (3, 16, -22)  |
| Precentral gyrus       | 652 / -     | 4.3 (-49, 2, 37) / 3.6 (46, 19, 35)   |
| Orbital gyrus          | 207 / -     | 4.3 (-7, 50, -20) / 4.6 (15, 22, -23) |

**Cingulate gyrus**

|                    |         |                     |
|--------------------|---------|---------------------|
| Anterior cingulate | 770 / - | 4.3 (-4, 48, 7) / - |
|--------------------|---------|---------------------|

---



---

|                                 |             |                                          |
|---------------------------------|-------------|------------------------------------------|
| Cingulate gyrus (BA 24, 31, 32) | 681 / 267   | 3.8 (-4, 18, 38) / 3.6 (7, -27, 41)      |
| Posterior cingulate             | 474 / 593   | 3.7 (-9, -62, 16) / 3.8 (9, -57, 18)     |
| <b><i>Temporal</i></b>          |             |                                          |
| Middle temporal gyrus           | 1156 / 1778 | 4.2 (-64, -30, -14) / 5.4 (37, -75, 23)  |
| Fusiform gyrus                  | - / 859     | 3.7 (-50, -26, -25) / 4.5 (48, -57, -11) |
| Inferior temporal gyrus         | 652 / 650   | 4.0 (-61, -33, -16) / 4.6 (52, -54, -11) |
| Superior temporal gyrus         | 652 / 326   | 4.3 (-53, 4, 0) / 3.9 (53, -58, 25)      |
|                                 | - / 297     | - / 3.7 (39, -29, -19)                   |
| <b><i>Parietal</i></b>          |             |                                          |
| Precuneus                       | 1956 / 3081 | 4.5 (-6, -58, 57) / 5.3 (31, -77, 36)    |
| Inferior parietal lobule        | 237 / 1926  | 3.4 (-53, -50, 41) / 4.7 (36, -54, 47)   |
| Superior parietal lobule        | 267 / 800   | 4.3 (-9, -61, 57) / 4.5 (27, -71, 45)    |
| Postcentral gyrus               | - / 444     | 3.2 (-4, -42, 64) / 4.0 (4, -39, 66)     |
| Angular gyrus                   | - / 385     | - / 4.8 (37, -73, 33)                    |
| <b><i>Occipital</i></b>         |             |                                          |
| Middle occipital gyrus          | - / 1393    | - / 4.8 (37, -73, 17)                    |
| Lingual gyrus                   | - / 830     | - / 4.3 (28, -78, -10)                   |

---

---

|                          |           |                                         |
|--------------------------|-----------|-----------------------------------------|
| Cuneus                   | 296 / 593 | 3.7 (-3, -75, 36) / 5.1 (31, -79, 32)   |
| Inferior occipital gyrus | - / 504   | 3.2 (-27, -88, -9) / 4.6 (34, -84, -10) |
| <b><i>Cerebellum</i></b> |           |                                         |
| Declive                  | - / 356   | - / 3.7 (36, -67, -19)                  |
| Culmen                   | 207 / -   | 3.7 (-31, -39, -27) / -                 |

---

\* Coordinates for peak  $t$  values are reported based of Group ICA for fMRI Toolbox, GIFT1.3i. All outcomes are presented at  $p=.005$ , False Discovery Rate-corrected,  $k=200$  voxels threshold.

DSM-IV – the Diagnostic and Statistical Manual of Mental Disorders, 4th edition, American Psychiatric Association (1994), BA – Brodmann area

**Table S4. Regional gray matter outcomes for inverse correlations with the Positive and Negative Syndrome Scale/Positive Subscale score in probands with schizoaffective disorder [ $p=.005$ , False Discovery Rate-corrected,  $k=200$  voxels] and schizophrenia [ $p=.05$ , False Discovery Rate-corrected,  $k=200$  voxels], and with lifetime duration of psychosis in probands with schizoaffective disorder [ $p=.05$ , False Discovery Rate-corrected,  $k=200$  voxels]**

| Group                                                                    | Brain region                    | Volume (Voxels) | Maximum $t$ (Talairach coordinates: $x, y, z$ )* |
|--------------------------------------------------------------------------|---------------------------------|-----------------|--------------------------------------------------|
|                                                                          |                                 | Left / Right    | Left / Right                                     |
| <b>The Positive and Negative Syndrome Scale, Positive Subscale Score</b> |                                 |                 |                                                  |
| <b>Probands with Schizoaffective Disorder</b>                            | <b><i>Frontal</i></b>           |                 |                                                  |
|                                                                          | Superior frontal gyrus          | 2400 / 3556     | 5.2 (-16, 5, 63) / 5.0 (15, 42, 44)              |
|                                                                          | Middle frontal gyrus            | 948 / 2370      | 5.4 (-19, 7, 62) / 4.8 (19, 3, 59)               |
|                                                                          | Precentral gyrus                | 593 / 1007      | 3.9 (-39, -17, 45) / 4.1 (24, -10, 67)           |
|                                                                          | Medial frontal gyrus            | 504 / 741       | 4.5 (-12, 4, 58) / 4.4 (10, 43, 42)              |
|                                                                          | Inferior frontal gyrus          | 622 / -         | 4.0 (-46, 40, -12) / -                           |
|                                                                          | Paracentral lobule              | - / 296         | - / 4.4 (7, -42, 53)                             |
|                                                                          | <b><i>Cingulate gyrus</i></b>   |                 |                                                  |
|                                                                          | Cingulate gyrus (BA 23, 24, 31) | 1333 / 1067     | 4.3 (-3, -17, 30) / 4.4 (4, -16, 31)             |
|                                                                          | Posterior cingulate             | 978 / -         | 4.2 (-18, -66, 17) / -                           |
| <b><i>Temporal</i></b>                                                   |                                 |                 |                                                  |

---

|                          |             |                                          |
|--------------------------|-------------|------------------------------------------|
| Fusiform gyrus           | 770 / 444   | 4.8 (-36, -78, -11) / 4.4 (31, -64, -7)  |
| Parahippocampal gyrus    | 207 / -     | 4.0 (-12, -45, 5) / -                    |
| <b><i>Parietal</i></b>   |             |                                          |
| Precuneus                | 3763 / 2400 | 4.9 (-13, -71, 27) / 5.4 (13, -48, 55)   |
| Postcentral gyrus        | 385 / 1304  | 3.7 (-15, -52, 65) / 4.1 (30, -44, 62)   |
| Inferior parietal lobule | 1037 / -    | 4.3 (-39, -46, 38) / -                   |
| Superior parietal lobule | 444 / 356   | 4.0 (-9, -63, 57) / 4.1 (21, -47, 58)    |
| <b><i>Occipital</i></b>  |             |                                          |
| Lingual gyrus            | 2548 / 1037 | 5.1 (-9, -71, -1) / 4.3 (31, -69, -7)    |
| Cuneus                   | 1630 / -    | 5.1 (-12, -74, 30) / -                   |
| Middle occipital gyrus   | 1007 / 296  | 5.0 (-37, -82, -9) / 3.9 (37, -69, -10)  |
| Inferior occipital gyrus | 770 / -     | 5.1 (-34, -82, -11) / -                  |
| <b><i>Cerebellum</i></b> |             |                                          |
| Declive                  | 1867 / 1126 | 4.3 (-19, -62, -21) / 4.0 (33, -62, -11) |
| Culmen                   | 1067 / 919  | 4.3 (-22, -59, -22) / 4.1 (4, -52, -15)  |
| Pyramis                  | 711 / 356   | 4.2 (-10, -70, -23) / 4.0 (16, -71, -27) |

---

|                                               |                                     |            |                                      |
|-----------------------------------------------|-------------------------------------|------------|--------------------------------------|
|                                               | Uvula                               | 563 / -    | 4.2 (-19, -67, -23) / -              |
| <b>Probands with Schizophrenia</b>            | <b><i>Insular</i></b>               | - / 593    | - / 4.8 (36, -28, 19)                |
|                                               | <b><i>Parahippocampal gyrus</i></b> | 444 / -    | 4.0 (-25, -5, -17) / -               |
| <b>Lifetime Duration of Psychosis</b>         |                                     |            |                                      |
| <b>Probands with Schizoaffective Disorder</b> | <b><i>Temporal</i></b>              |            |                                      |
|                                               | BA21, sub-gyral gray matter         | 356 / -    | 4.5 (-31, -14, -8) / -               |
|                                               | <b><i>Basal ganglia</i></b>         |            |                                      |
|                                               | Putamen                             | 1333 / 563 | 4.3 (-28, -11, -7) / 3.8 (6, -3, -6) |
|                                               | Lentiform nucleus                   | 919 / 444  | 4.4 (-13, 6, -3) / 4.1 (18, 9, 4)    |
|                                               | <b><i>Thalamus</i></b>              | 859 / -    | 4.5 (-13, -23, 7) / -                |

\* Coordinates for peak *t* values are reported based of Group ICA for fMRI Toolbox, GIFT1.3i.

BA – Brodmann area

**Figure S1. Regional gray matter volume reductions in probands with schizophrenia as compared to healthy controls across the B-SNIP sites**

**Site 1**

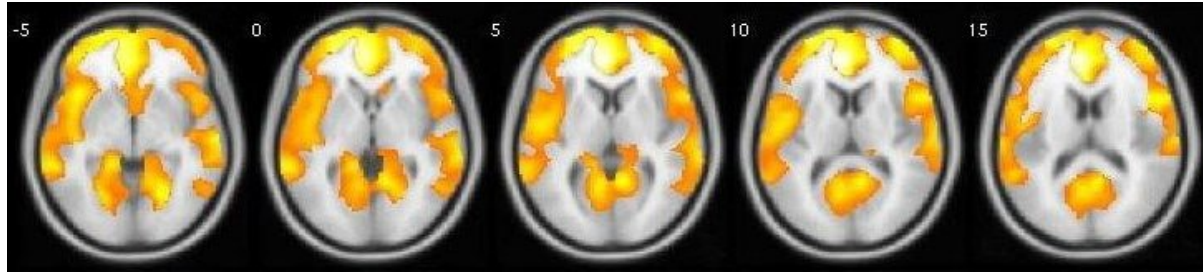

**Site 2**

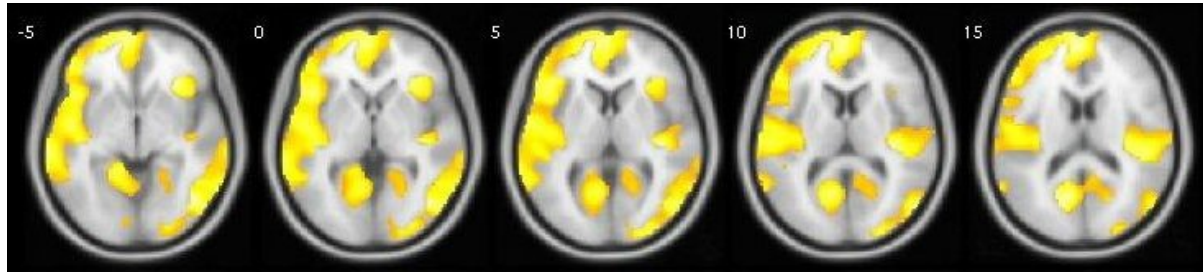

**Site 3**

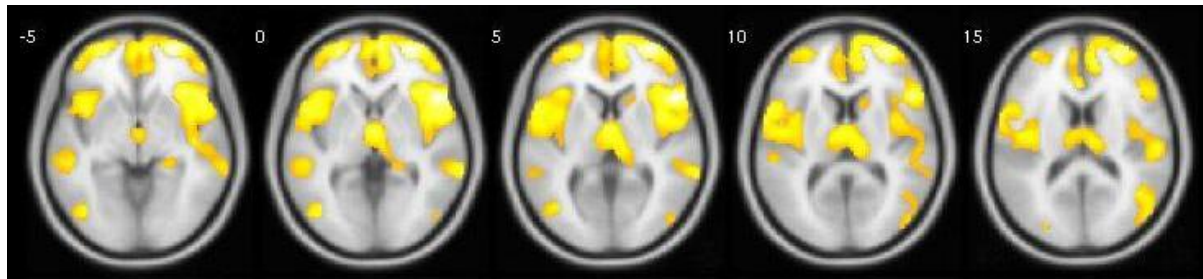

**Site 4**

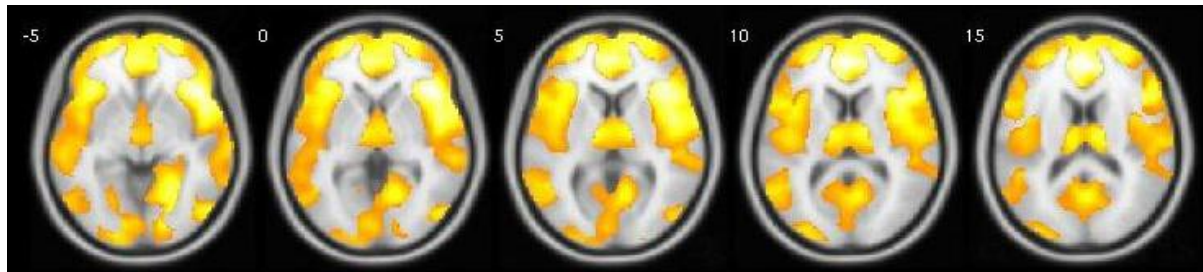

Figure S2. Illustrative analysis defining the optimal statistical threshold:  $p < .005$ , False Discovery Rate-corrected,  $k=200$ voxels

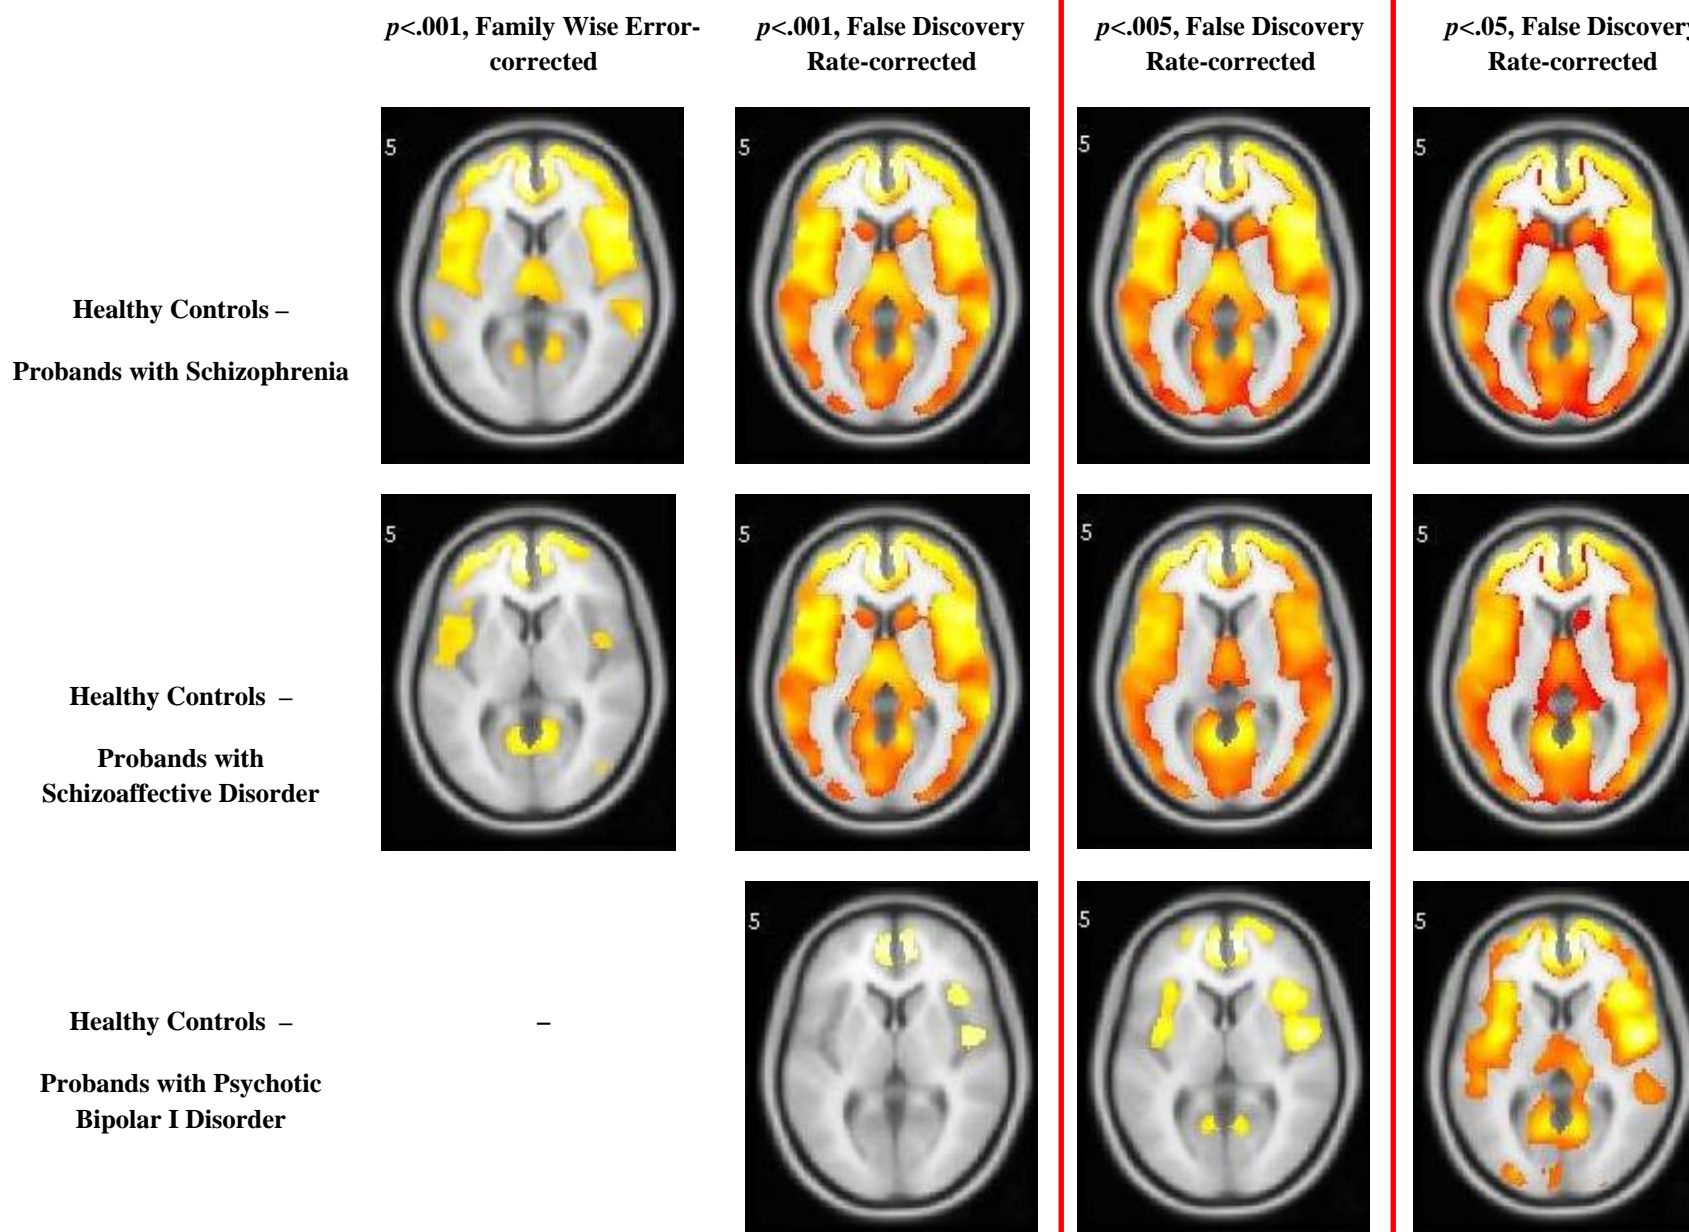

Supplement: 1285_ds001.pdf [file 1285_ds001.pdf]
